# Supplementary material for: RETRACTED ARTICLE: Polyphyllin I suppresses the formation of vasculogenic mimicry via Twist1/VE-cadherin pathway
Source: PubMed Central journal article supplement (PMC6125388; doi:10.1038/s41419-018-0902-5), 2018-09-05
Supplement: 41419_2018_902_MOESM2_ESM.pdf [file 41419_2018_902_MOESM2_ESM.pdf]

| Age | Sex | Pathological grades | clinical stage (cTNM) | T  | N  | M  | Tumor differentiation | Tumor number | Tumor size (cm)                                      | Postoperative vascular invasion | HbsAg  | ALP    | Preoperative BCLC stage |
|-----|-----|---------------------|-----------------------|----|----|----|-----------------------|--------------|------------------------------------------------------|---------------------------------|--------|--------|-------------------------|
| 54  | M   | III                 | IV A                  | T4 | N1 | M0 | poor                  | 1            | 5.3×5.0×3.0                                          | No                              | 0.2    | 227.26 | B                       |
| 61  | M   | II~III              | IV B                  | T4 | N1 | M1 | mediate               | 1            | 8.1×9.2×9.6                                          | Yes                             | 178.42 | 60.98  | C                       |
| 66  | M   | I-II                | III B                 | T3 | N0 | M0 | mediate               | 1            | 13.0×9.0×4.0                                         | Yes                             | 33.51  | 64.21  | B                       |
| 57  | M   | II~III              | IV A                  | T4 | N1 | M0 | poor                  | 1            | 11.0×9.8×9.0                                         | No                              | 107.6  | 182.48 | C                       |
| 57  | F   | II~III              | IV B                  | T4 | N1 | M1 | poor                  | 1            | 3.1×3.8×2.6                                          | Yes                             | 29.42  | 69.17  | C                       |
| 56  | M   | II                  | IV A                  | T3 | N1 | M0 | mediate               | 1            | 8.7×6.0×5.0                                          | Yes                             | 63.04  | 80.89  | B                       |
| 56  | M   | II                  | IV A                  | T4 | N1 | M0 | poor                  | 1            | 2.9×2.5×2.0                                          | Yes                             | 356.3  | 58.45  | A1                      |
| 52  | M   | II                  | IV A                  | T4 | N1 | M0 | mediate               | 1            | 9.0×8.5×4.0                                          | Yes                             | 327.1  | 97.84  | C                       |
| 74  | M   | II-III              | III B                 | T3 | N0 | M0 | mediate               | 1            | 21.0×12.0×6.0                                        | Yes                             | 412.4  | 99.22  | C                       |
| 50  | M   | II                  | II                    | T2 | N0 | M0 | mediate               | 1            | 5.8×5.9×3.0                                          | No                              | 289.3  | 109.44 | B                       |
| 47  | M   | II                  | IV A                  | T3 | N1 | M0 | mediate               | 3            | 1: 0.3×0.2×0.5;<br>2: 3.0×2.1×1.4;<br>3: 2.6×3.8×4.0 | Yes                             | 245.3  | 98.77  | A4                      |
| 50  | F   | I-II                | IV A                  | T3 | N1 | M0 | well                  | 1            | 13.5×14.3×12                                         | Yes                             | 71.43  | 126.62 | C                       |
| 57  | M   | II                  | IV A                  | T3 | N1 | M0 | mediate               | 1            | 19.0×16.0×6.0                                        | Yes                             | 300.77 | 277.6  | C                       |
| 66  | M   | I                   | IV A                  | T3 | N1 | M0 | well                  | 1            | 9.2×8.0×8.4                                          | Yes                             | 212.6  | 100.63 | B                       |
| 57  | M   | II                  | IV A                  | T3 | N1 | M0 | mediate               | 1            | 5.0×5.3×6.0                                          | Yes                             | 207    | 97.73  | B                       |
| 43  | M   | I~II                | IV A                  | T3 | N1 | M0 | well                  | 1            | 9.3×10.5×11.0                                        | Yes                             | 150    | 140.89 | B                       |
| 54  | M   | III                 | IV A                  | T4 | N1 | M0 | poor                  | 1            | 4.0×3.5×3.5                                          | No                              | 40.13  | 60.23  | C                       |
| 80  | F   | II~III              | IV A                  | T3 | N1 | M0 | mediate               | 1            | 7.3×6.1×5.0                                          | Yes                             | 309.4  | 142    | B                       |
| 28  | F   | II                  | IV A                  | T3 | N1 | M0 | mediate               | 1            | 2.7×2.6×2.0                                          | Yes                             | 251.8  | 146.89 | A1                      |
| 56  | F   | I-II                | III B                 | T3 | N0 | M0 | mediate               | 1            | 7.5×8.5×10.5                                         | Yes                             | 30.41  | 70.12  | C                       |
| 54  | M   | III                 | III B                 | T3 | N0 | M0 | mediate               | 1            | 6.9×5.0×3.5                                          | Yes                             | 72.9   | 66.59  | B                       |
| 63  | M   | II                  | III B                 | T3 | N0 | M0 | mediate               | 1            | 9.0×10.1×12.0                                        | Yes                             | 43.01  | 299.62 | B                       |
| 37  | M   | III                 | II                    | T2 | N0 | M0 | mediate               | 1            | 8.0×10.0×9.7                                         | No                              | 298.8  | 79     | B                       |
| 61  | M   | II                  | III B                 | T3 | N0 | M0 | mediate               | 1            | 11.0×10.0×11.0                                       | Yes                             | 60.44  | 95.1   | B                       |
| 35  | M   | III                 | III B                 | T3 | N0 | M0 | mediate               | 1            | 2.5×2.0×1.8                                          | Yes                             | 38.7   | 48.54  | A2                      |
| 17  | F   | II                  | III B                 | T3 | N0 | M0 | mediate               | 1            | 2.8×19.7×6.7                                         | Yes                             | 21.5   | 80.71  | C                       |
| 35  | M   | III                 | III B                 | T3 | N0 | M0 | mediate               | 1            | 8.0×6.0×6.8                                          | Yes                             | 34.61  | 89.83  | B                       |
| 48  | M   | III                 | III B                 | T3 | N0 | M0 | poor                  | 1            | 6.2×5.3×3.2                                          | Yes                             | 283.4  | 110.79 | B                       |
| 72  | M   | II                  | III B                 | T3 | N0 | M0 | mediate               | 1            | 3.4×2.6×2.0                                          | Yes                             | 228.7  | 145.67 | A1                      |
| 58  | M   | II                  | III B                 | T3 | N0 | M0 | mediate               | 1            | 4.5×5.5×3.9                                          | Yes                             | 413.08 | 74.92  | B                       |
| 58  | M   | II~III              | IV B                  | T4 | N1 | M1 | poor                  | 1            | 12.8×10.5×7.6                                        | Yes                             | 214.5  | 237.9  | C                       |
| 44  | M   | II                  | II                    | T2 | N0 | M0 | mediate               | 1            | 8.2×6.0×4.3                                          | No                              | 251.1  | 106.7  | B                       |

|    |   |        |       |    |    |    |         |   |                                                      |     |        |        |    |
|----|---|--------|-------|----|----|----|---------|---|------------------------------------------------------|-----|--------|--------|----|
| 33 | M | II~III | IV A  | T4 | N1 | M0 | poor    | 2 | 1: 2.4×2.1×1.8;<br>2: 3.6×4.1×1.5                    | No  | 0.21   | 68.32  | A4 |
| 56 | M | II     | IV A  | T4 | N1 | M0 | poor    | 1 | 2.4×3.5×2.2                                          | Yes | 53.9   | 135.89 | A3 |
| 49 | M | II     | III C | T4 | N0 | M0 | mediate | 1 | 3.5×2.8×2.3                                          | Yes | 32.8   | 247.98 | A1 |
| 52 | M | II     | IV A  | T4 | N1 | M0 | mediate | 1 | 7.0×7.9×7.0                                          | Yes | 269.12 | 91.45  | C  |
| 78 | M | II     | III B | T3 | N0 | M0 | mediate | 1 | 5.3×4.0×3.8                                          | Yes | 6.5    | 77.63  | A2 |
| 66 | M | I~II   | IV A  | T3 | N1 | M0 | mediate | 1 | 13.7×12.4×15.0                                       | Yes | 177.8  | 143.29 | C  |
| 56 | M | II     | IV A  | T4 | N1 | M0 | mediate | 1 | 4.2×2.9×3.5                                          | Yes | 106.3  | 230.02 | A3 |
| 57 | M | II~III | IV A  | T4 | N1 | M0 | poor    | 1 | 7.8×8.0×4.2                                          | No  | 72.22  | 119    | C  |
| 69 | F | II     | IV A  | T4 | N1 | M0 | poor    | 1 | 9.0×10.6×7.8                                         | Yes | 41.86  | 108.47 | C  |
| 61 | M | II~III | IV B  | T4 | N1 | M1 | poor    | 1 | 6.5×7.5×9.1                                          | Yes | 201    | 67.77  | C  |
| 56 | M | II~III | IV A  | T3 | N1 | M0 | poor    | 1 | 6.3×6.0×6.0                                          | Yes | 61.02  | 68.99  | C  |
| 50 | M | II     | II    | T2 | N0 | M0 | mediate | 1 | 12.0×15.0×12.4                                       | No  | 0.18   | 110.32 | B  |
| 60 | M | II     | III B | T3 | N0 | M0 | mediate | 1 | 7.1×7.2×8.5                                          | Yes | 0.39   | 117.56 | B  |
| 43 | M | II     | II    | T2 | N0 | M0 | mediate | 1 | 5.3×3.6×3.0                                          | No  | 177.9  | 99.03  | A2 |
| 63 | M | II     | II    | T2 | N0 | M0 | mediate | 1 | 4.5×4.9×4.0                                          | No  | 123.8  | 100.98 | A1 |
| 35 | M | II     | III B | T3 | N0 | M0 | mediate | 1 | 7.6×6.1×7.3                                          | Yes | 350.79 | 56.78  | B  |
| 29 | M | II     | III B | T3 | N0 | M0 | mediate | 1 | 7.3×5.1×7.0                                          | Yes | 225.06 | 53.87  | B  |
| 40 | M | II     | II    | T2 | N0 | M0 | mediate | 1 | 6.0×3.5×5.0                                          | No  | 118.2  | 120.35 | A1 |
| 56 | M | II     | IV A  | T3 | N1 | M0 | mediate | 1 | 6.5×5.0×4.7                                          | Yes | 169.6  | 145.61 | B  |
| 48 | M | II~III | III A | T3 | N0 | M0 | mediate | 3 | 1: 2.1×1.3×1.1;<br>2: 0.9×0.3×0.4;<br>3: 1.8×2.3×1.5 | No  | 276.7  | 82.2   | A4 |
| 50 | M | II~III | III B | T3 | N0 | M0 | mediate | 1 | 8.2×8.4×7.0                                          | Yes | 156.7  | 88.88  | B  |
| 47 | M | II~III | III B | T3 | N0 | M0 | mediate | 1 | 14.0×14.0×8.0                                        | Yes | 300.98 | 52.35  | C  |
| 44 | M | II~III | III B | T3 | N0 | M0 | mediate | 1 | 9.0×8.0×4.0                                          | Yes | 363.83 | 54.66  | B  |
| 57 | F | II~III | IV B  | T4 | N1 | M1 | poor    | 1 | 8.0×7.5×6.8                                          | Yes | 275.5  | 108.54 | C  |
| 33 | M | II~III | II    | T2 | N0 | M0 | mediate | 1 | 9.6×9.2×8.9                                          | No  | 89.68  | 78.7   | B  |
| 41 | M | II~III | II    | T2 | N0 | M0 | mediate | 1 | 5.0×6.0×6.0                                          | No  | 90.71  | 82.5   | A2 |
| 38 | F | II~III | II    | T2 | N0 | M0 | mediate | 1 | 6.0×8.0×11.0                                         | No  | 229.9  | 99.16  | B  |
| 56 | M | II~III | III B | T3 | N0 | M0 | mediate | 1 | 6.6×5.0×5.5                                          | Yes | 0.07   | 65.41  | B  |
| 57 | M | II~III | IV A  | T4 | N1 | M0 | poor    | 1 | 7.5×7.0×6.0                                          | Yes | 211.4  | 106.56 | C  |
| 37 | M | II~III | II    | T2 | N0 | M0 | mediate | 1 | 7.6×6.8×7.0                                          | No  | 219.8  | 101.21 | B  |
| 38 | M | II~III | II    | T2 | N0 | M0 | mediate | 1 | 7.0×6.7×6.5                                          | No  | 252.2  | 103.87 | B  |
| 61 | M | II~III | IV B  | T4 | N1 | M1 | poor    | 1 | 10.8×9.7×9.8                                         | No  | 243    | 108.54 | C  |
| 33 | M | III    | II    | T2 | N0 | M0 | mediate | 1 | 16.9×11.3×12.4                                       | No  | 45.4   | 79.25  | B  |
| 65 | M | III    | II    | T2 | N0 | M0 | mediate | 1 | 3.8×3.8×4.5                                          | No  | 213.8  | 100.44 | A1 |
| 68 | M | III    | II    | T2 | N0 | M0 | mediate | 1 | 3.8×3.4×4.9                                          | No  | 292.8  | 104.56 | A3 |

|    |   |     |      |    |    |    |         |   |                                   |    |       |       |    |
|----|---|-----|------|----|----|----|---------|---|-----------------------------------|----|-------|-------|----|
| 54 | M | III | IV A | T4 | N1 | M0 | poor    | 1 | 3.4×2.5×2.2                       | No | 0.28  | 115.5 | A1 |
| 31 | M | III | II   | T2 | N0 | M0 | mediate | 2 | 1: 5.7×7.1×6.5;<br>2: 0.4×0.3×0.2 | No | 253.9 | 84.39 | B  |
