# Supplementary material for: RETRACTED ARTICLE: Polyphyllin I suppresses the formation of vasculogenic mimicry via Twist1/VE-cadherin pathway
Source: PubMed Central journal article supplement (PMC6125388; doi:10.1038/s41419-018-0902-5), 2018-09-05
Supplement: 41419_2018_902_MOESM3_ESM.pdf [file 41419_2018_902_MOESM3_ESM.pdf]

| Age | Sex | Pathological grades | clinical stage (cTNM) | T  | N  | M  | Tumor differentiation | Tumor number | Tumor size (cm) | Postoperative vascular invasion | HbsAg | ALP    | Preoperative BCLC stage |
|-----|-----|---------------------|-----------------------|----|----|----|-----------------------|--------------|-----------------|---------------------------------|-------|--------|-------------------------|
| 54  | M   | II                  | II                    | T2 | N0 | M0 | mediate               | 1            | 12.0×15.0×11.3  | No                              | 0.56  | 56.77  | B                       |
| 36  | M   | II                  | II                    | T2 | N0 | M0 | mediate               | 1            | 11.0×13.0×12.5  | No                              | 0.98  | 66.43  | B                       |
| 50  | M   | I-II                | III B                 | T3 | N0 | M0 | mediate               | 1            | 7.5×8.5×9.5     | Yes                             | 34.61 | 71.97  | C                       |
| 55  | M   | III                 | III B                 | T3 | N0 | M0 | mediate               | 1            | 8.0×6.0×4.6     | Yes                             | 82.8  | 69.59  | C                       |
| 67  | F   | II                  | II                    | T2 | N0 | M0 | mediate               | 1            | 13.0×15.0×11.2  | No                              | 0.88  | 228.93 | B                       |
| 65  | M   | II                  | II                    | T2 | N0 | M0 | mediate               | 1            | 11.0×15.0×14.0  | No                              | 6.3   | 49.56  | B                       |
| 54  | F   | III                 | III B                 | T3 | N0 | M0 | mediate               | 1            | 5.6×4.6×4.9     | Yes                             | 72.8  | 62.19  | A2                      |
| 55  | M   | III                 | II                    | T2 | N0 | M0 | mediate               | 1            | 5.9×6.2×3.6     | No                              | 76.2  | 65.3   | A3                      |
| 60  | F   | II                  | II                    | T2 | N0 | M0 | mediate               | 1            | 8.0×10.0×7.8    | No                              | 310.9 | 118.54 | B                       |
| 59  | M   | II                  | II                    | T2 | N0 | M0 | mediate               | 1            | 12.0×15.0×14.0  | No                              | 200.9 | 122.79 | B                       |
| 52  | M   | II                  | III B                 | T3 | N0 | M0 | mediate               | 1            | 11.0×10.0×11.0  | Yes                             | 60.44 | 92.5   | C                       |
| 33  | M   | III                 | III B                 | T3 | N0 | M0 | poor                  | 1            | 6.2×5.3×5.5     | Yes                             | 260   | 116.88 | B                       |
| 71  | M   | II                  | II                    | T2 | N0 | M0 | mediate               | 1            | 8.2×6.0×4.1     | No                              | 271.9 | 82.21  | B                       |
| 43  | M   | III                 | III B                 | T3 | N0 | M0 | mediate               | 1            | 3.0×2.1×1.9     | Yes                             | 66.5  | 46.66  | A2                      |
| 58  | M   | I-II                | II                    | T2 | N0 | M0 | mediate               | 1            | 5.0×3.0×3.0     | No                              | 177.9 | 90.13  | A2                      |
| 31  | M   | I-II                | II                    | T2 | N0 | M0 | mediate               | 1            | 5.5×3.5×3.0     | No                              | 77.5  | 89.12  | A2                      |
| 44  | M   | I                   | II                    | T2 | N0 | M0 | mediate               | 1            | 5.0×3.6×3.0     | No                              | 177.9 | 76.03  | A2                      |
| 52  | M   | II                  | II                    | T2 | N0 | M0 | mediate               | 1            | 6.0×8.0×11.0    | No                              | 229.9 | 89.98  | B                       |
| 48  | M   | II                  | II                    | T2 | N0 | M0 | mediate               | 1            | 4.0×6.0×10.0    | No                              | 212.3 | 85.34  | B                       |
| 73  | M   | III                 | II                    | T2 | N0 | M0 | mediate               | 1            | 16.1×10.2×8.5   | No                              | 48.6  | 123.65 | C                       |
